# Supplementary figures and images for: Are single-peaked tuning curves tuned for speed rather than accuracy?
Source: eLife journal article supplement (doi:10.7554/elife.84531), 2023-05-16

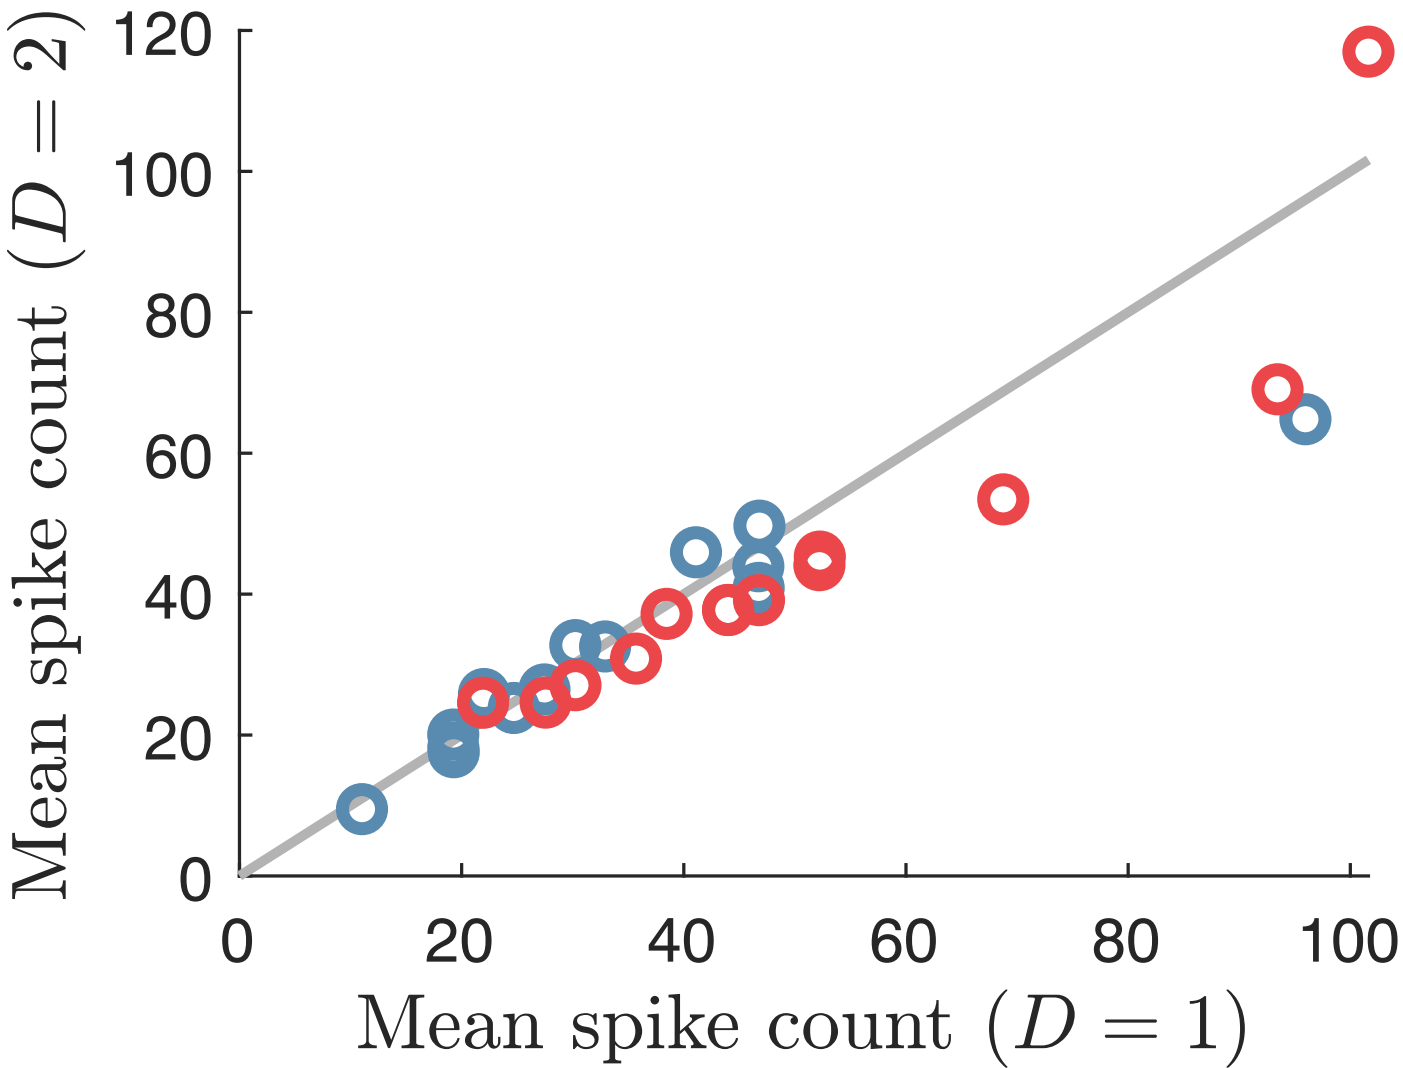

Supplement: supp [file elife-84531-supp-v1.zip]

**a**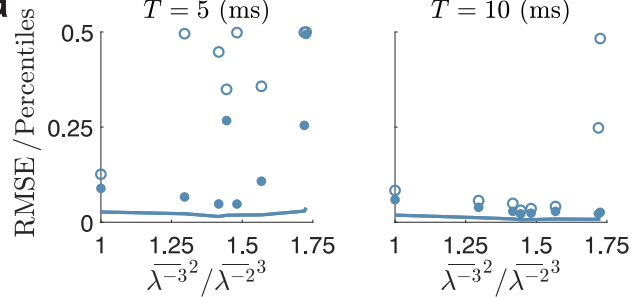**b**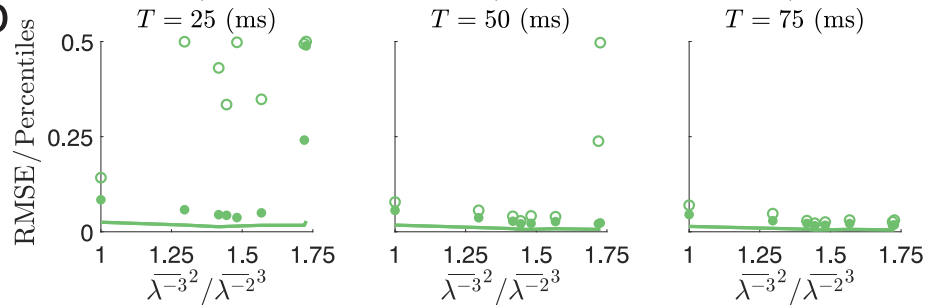**c**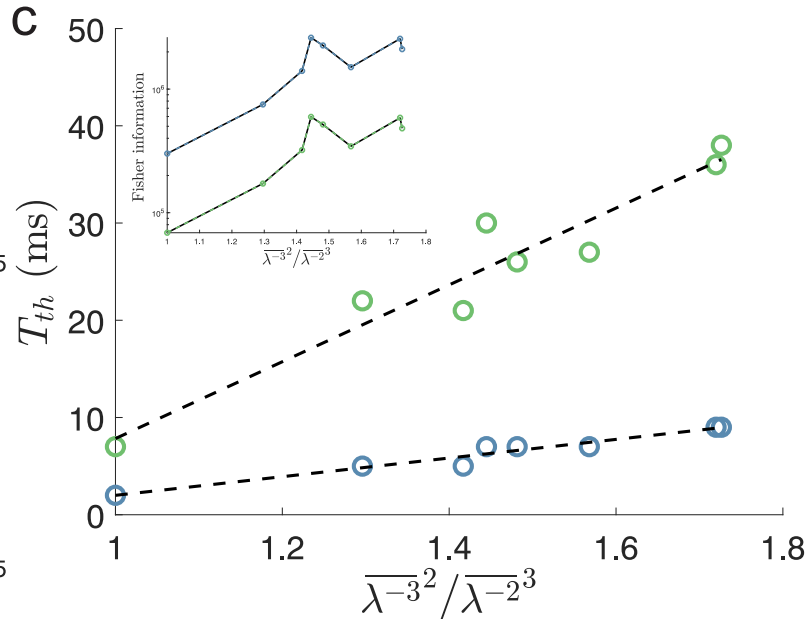

Supplement: supp [file elife-84531-supp-v1.zip]

**a** $T_{th}$  (ms)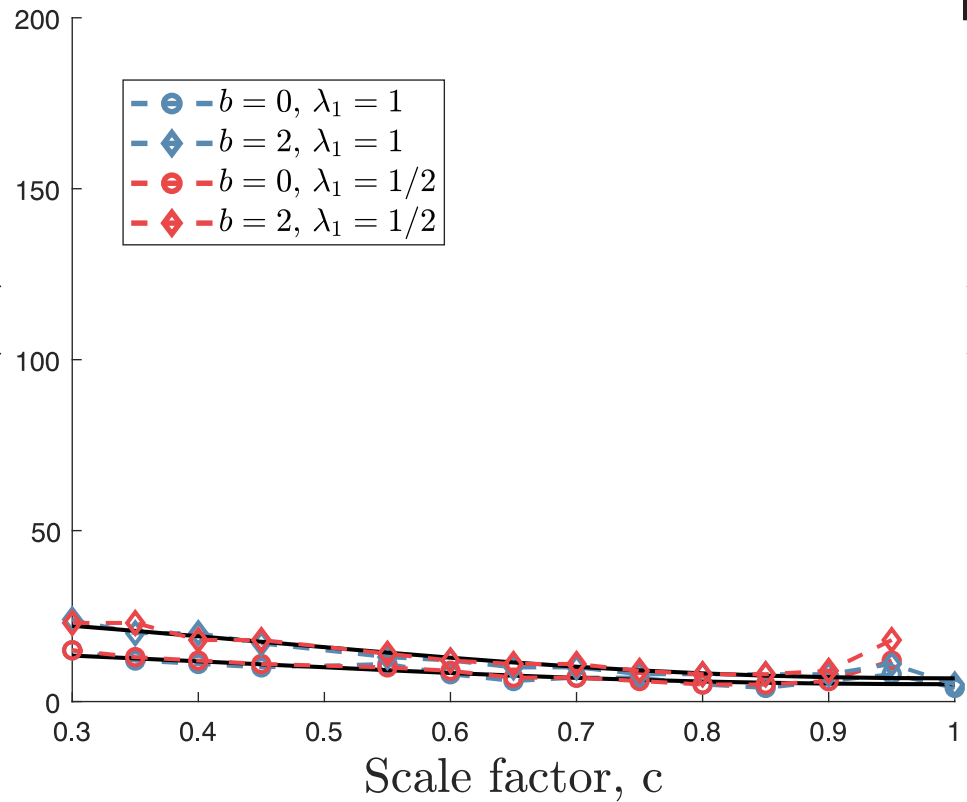**b** $T_{th}$  (ms)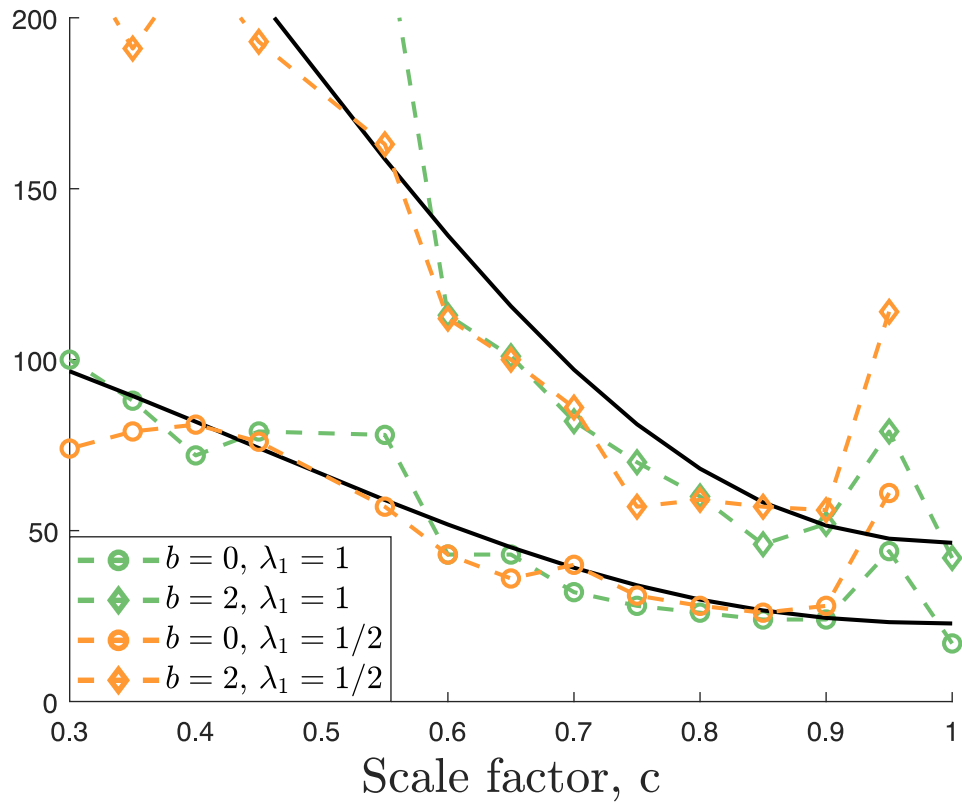

Supplement: supp [file elife-84531-supp-v1.zip]

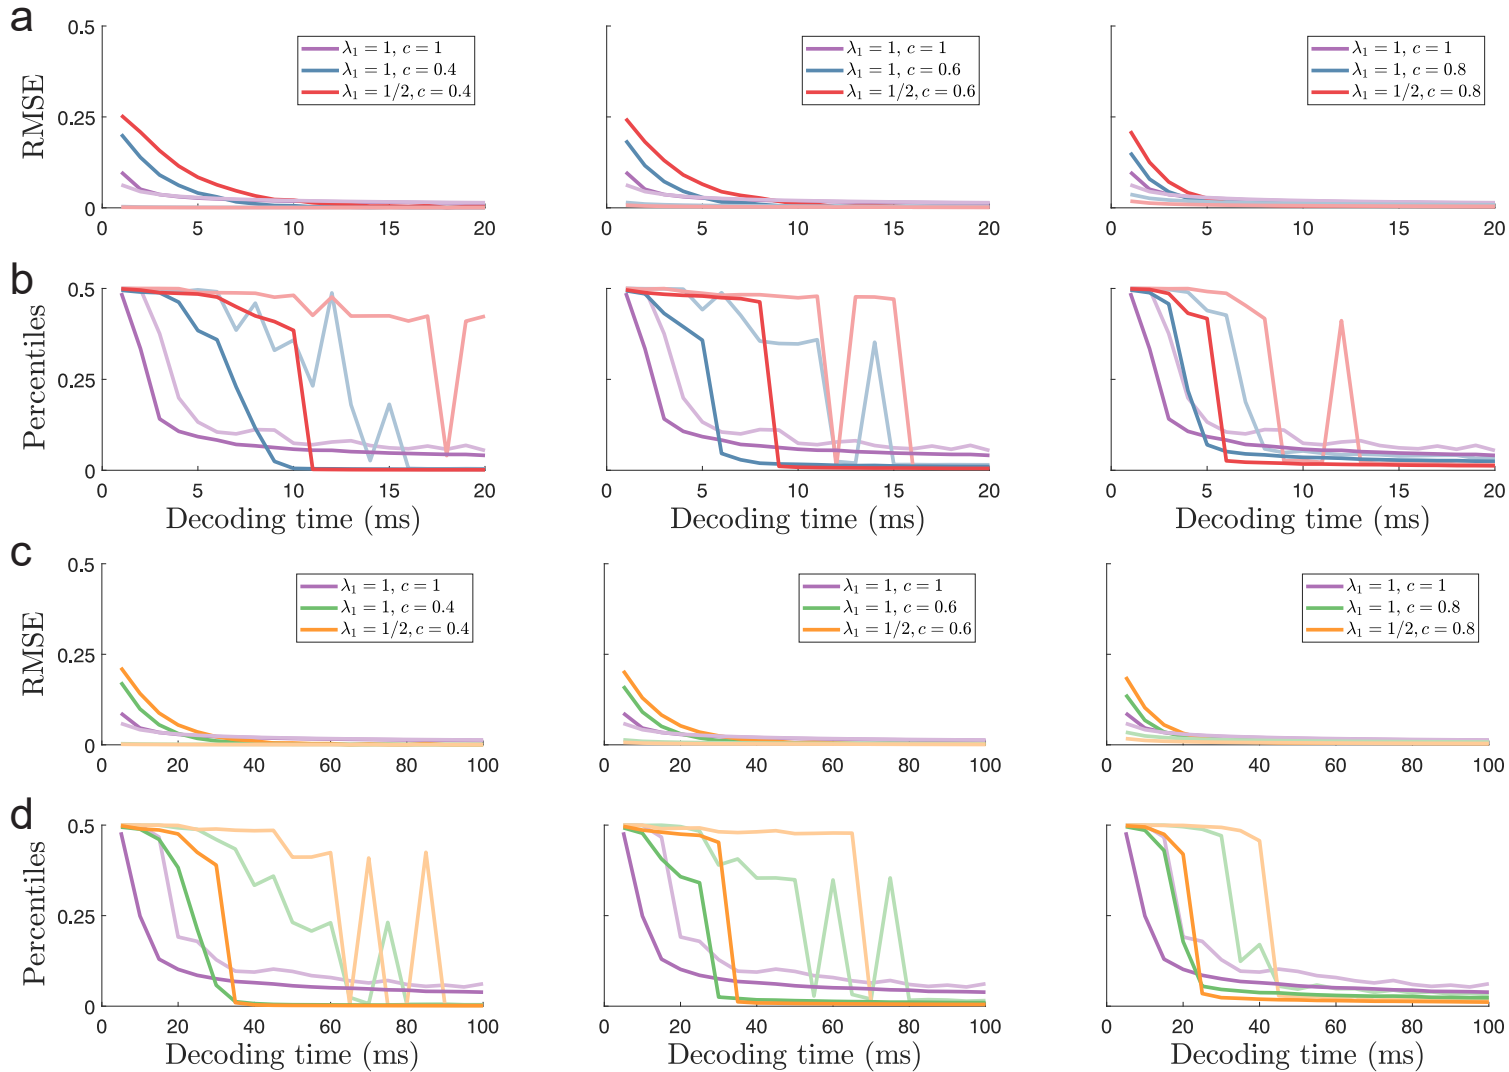

Supplement: supp [file elife-84531-supp-v1.zip]

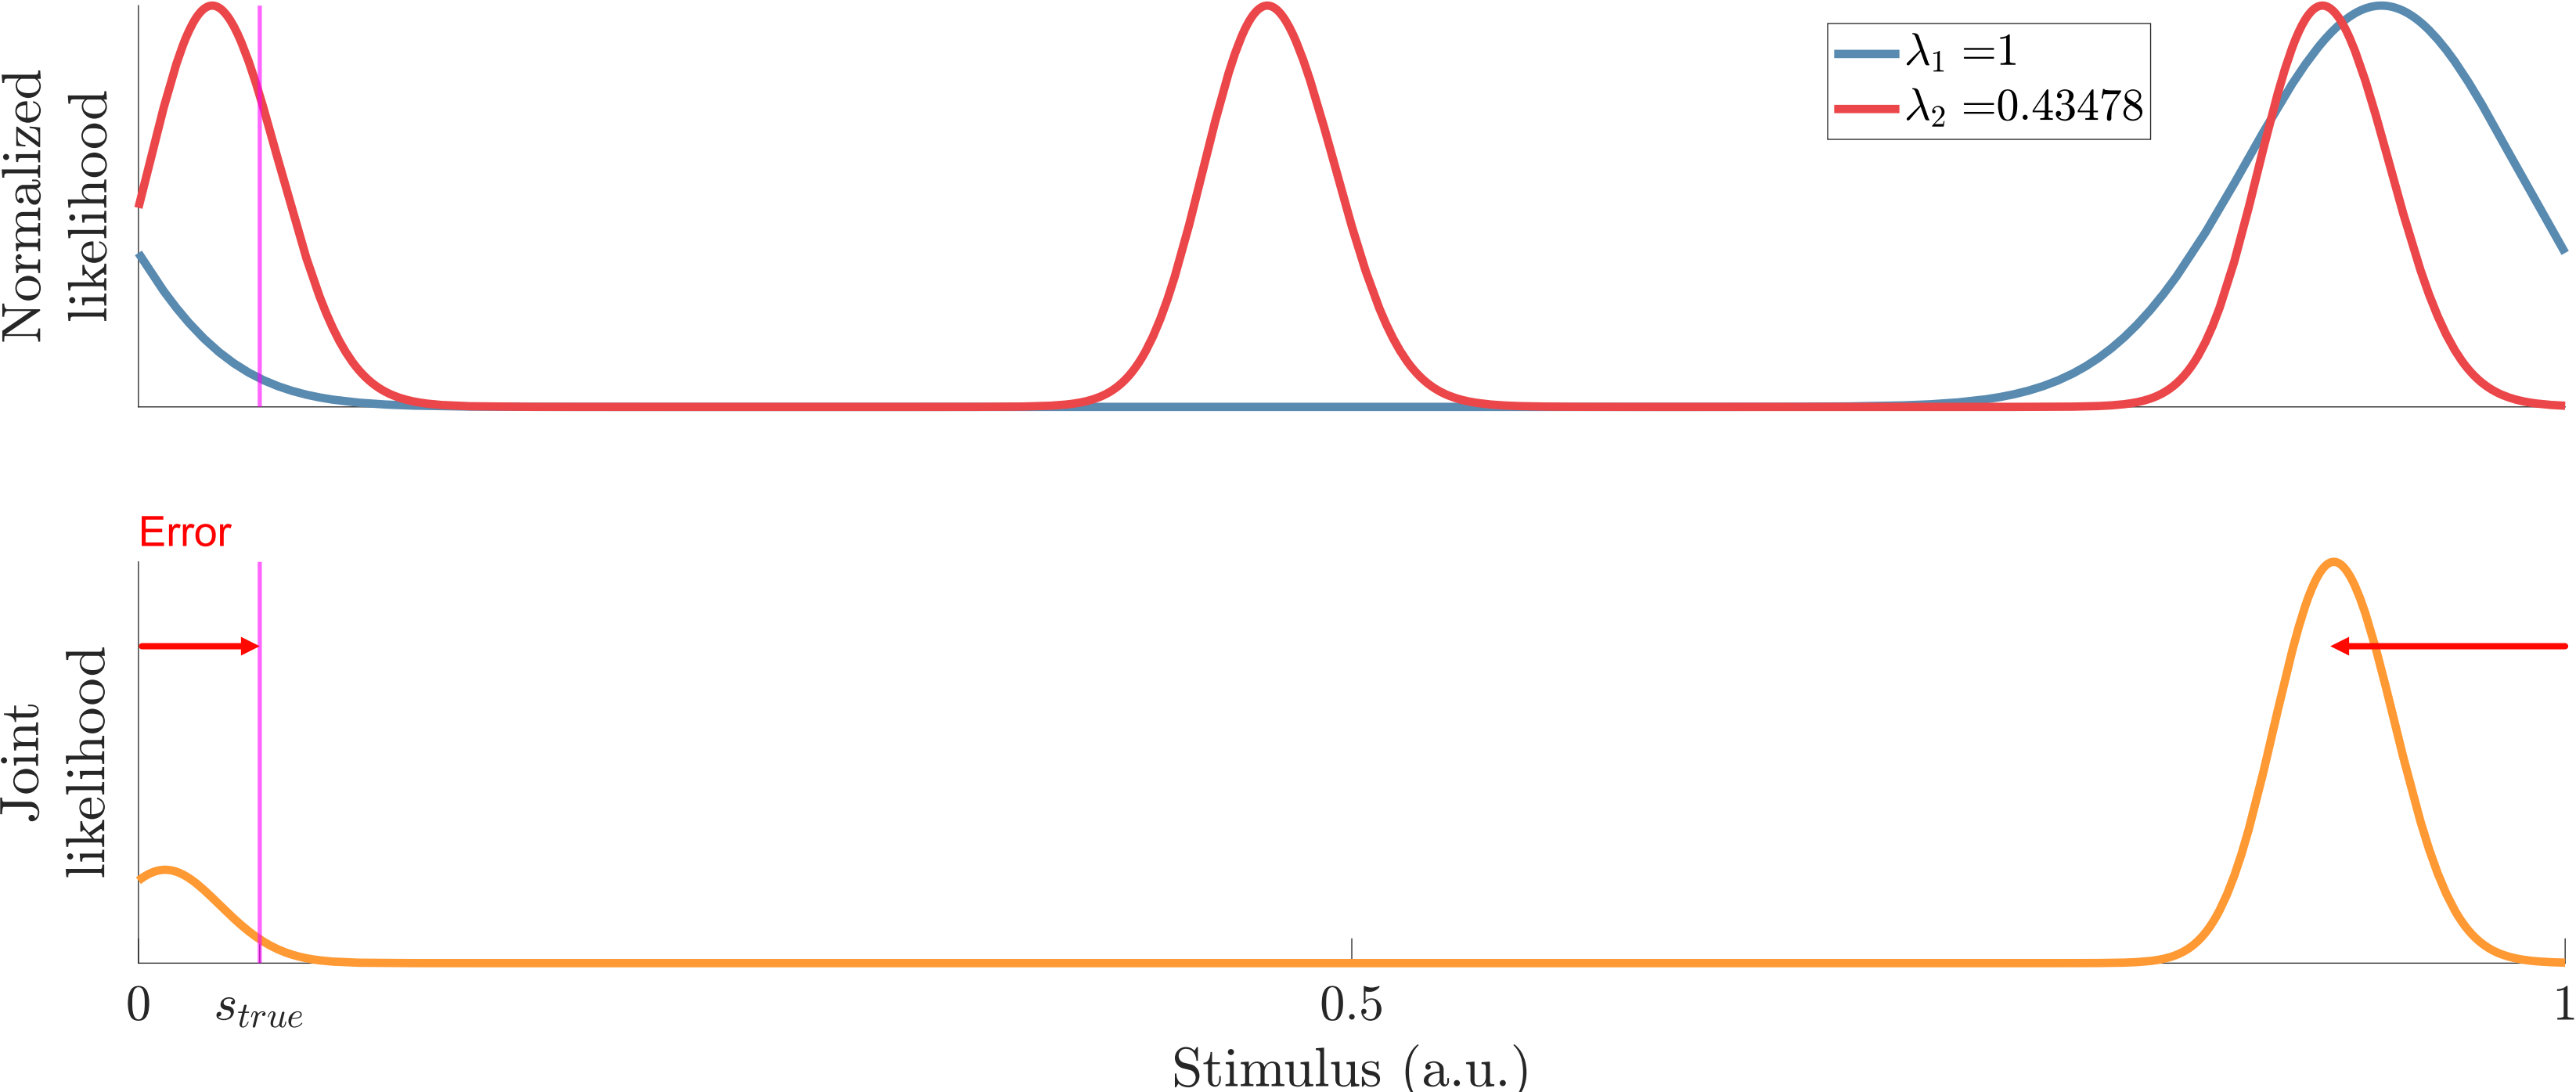

Supplement: supp [file elife-84531-supp-v1.zip]

**a** $T_{th}$  (ms)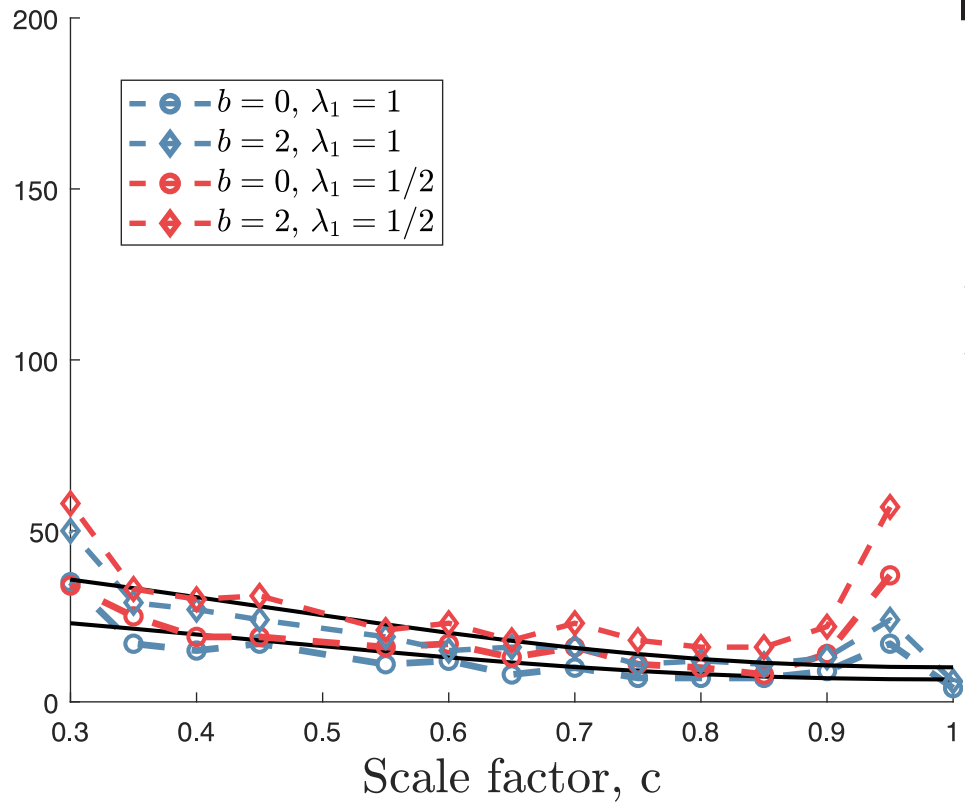**b** $T_{th}$  (ms)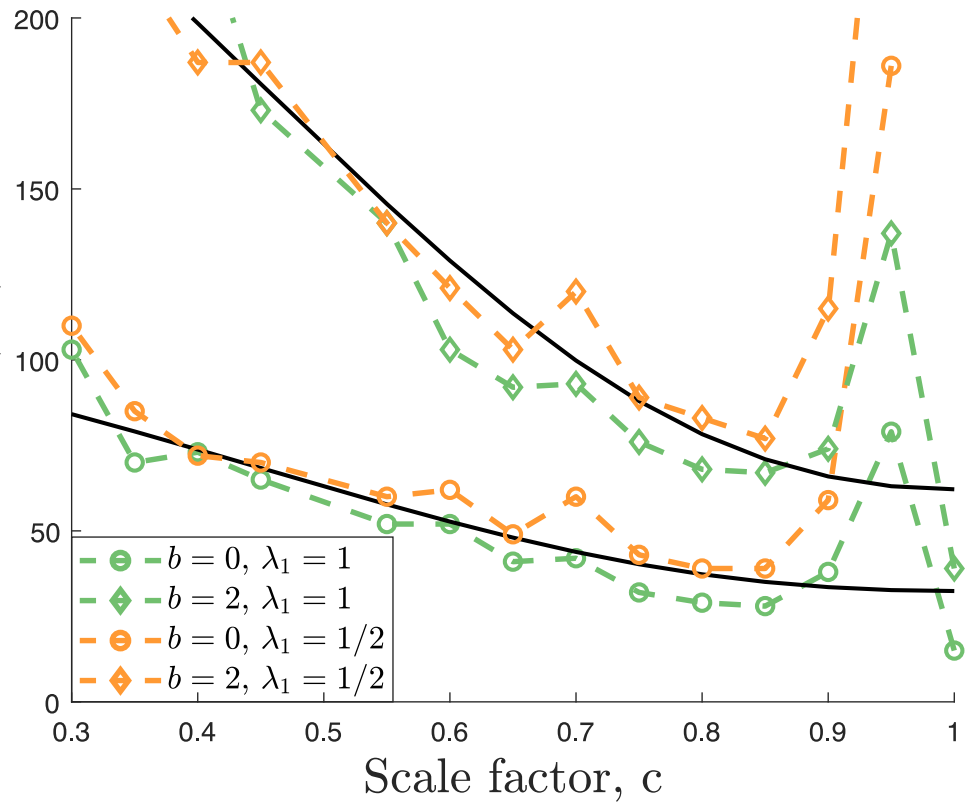

Supplement: supp [file elife-84531-supp-v1.zip]

**a**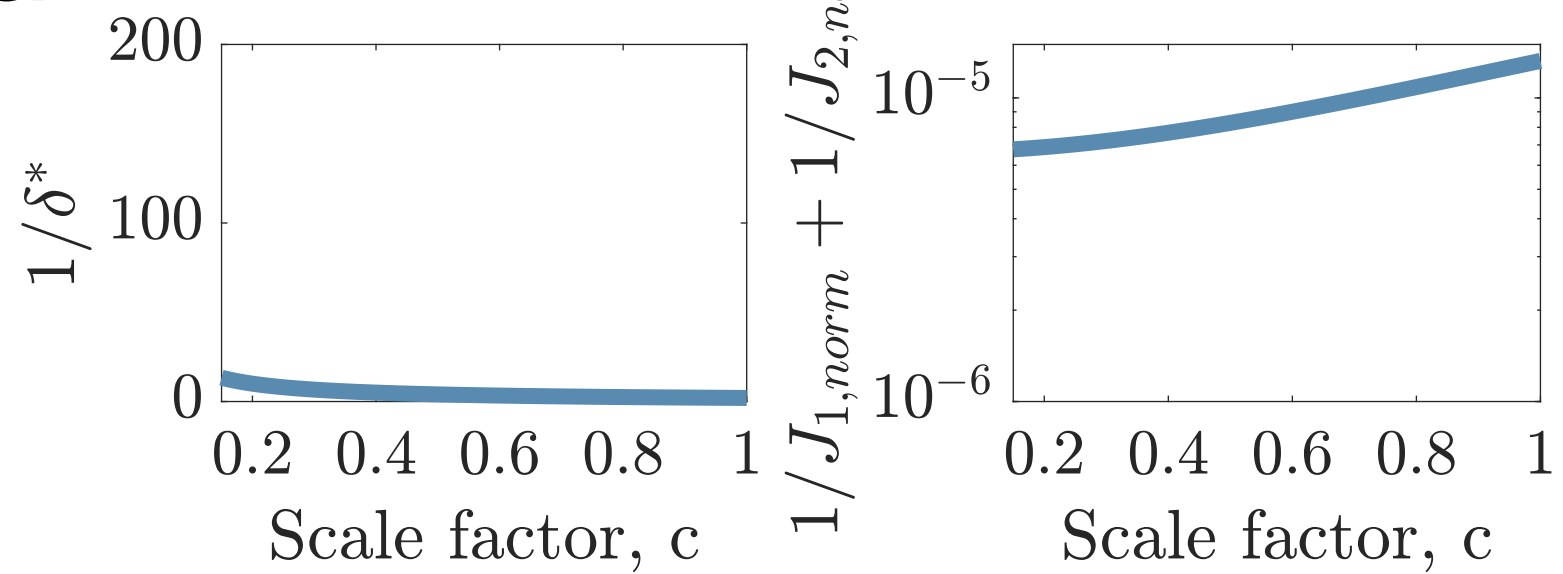**b**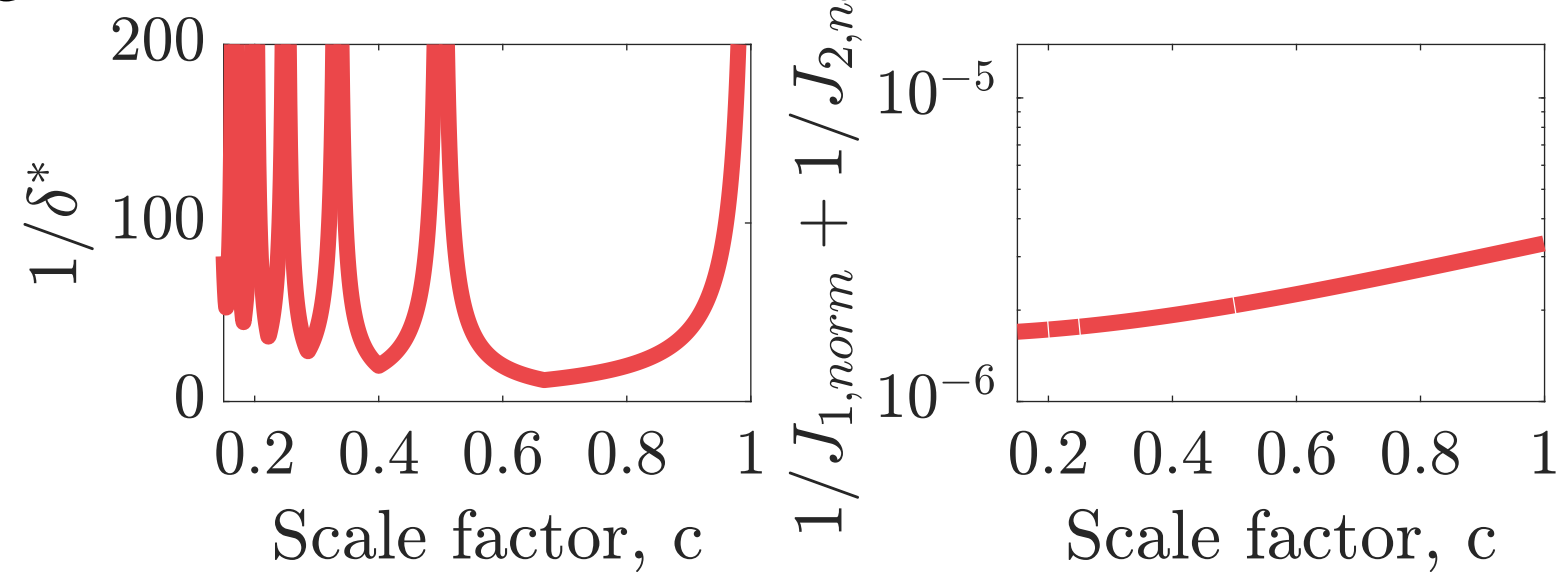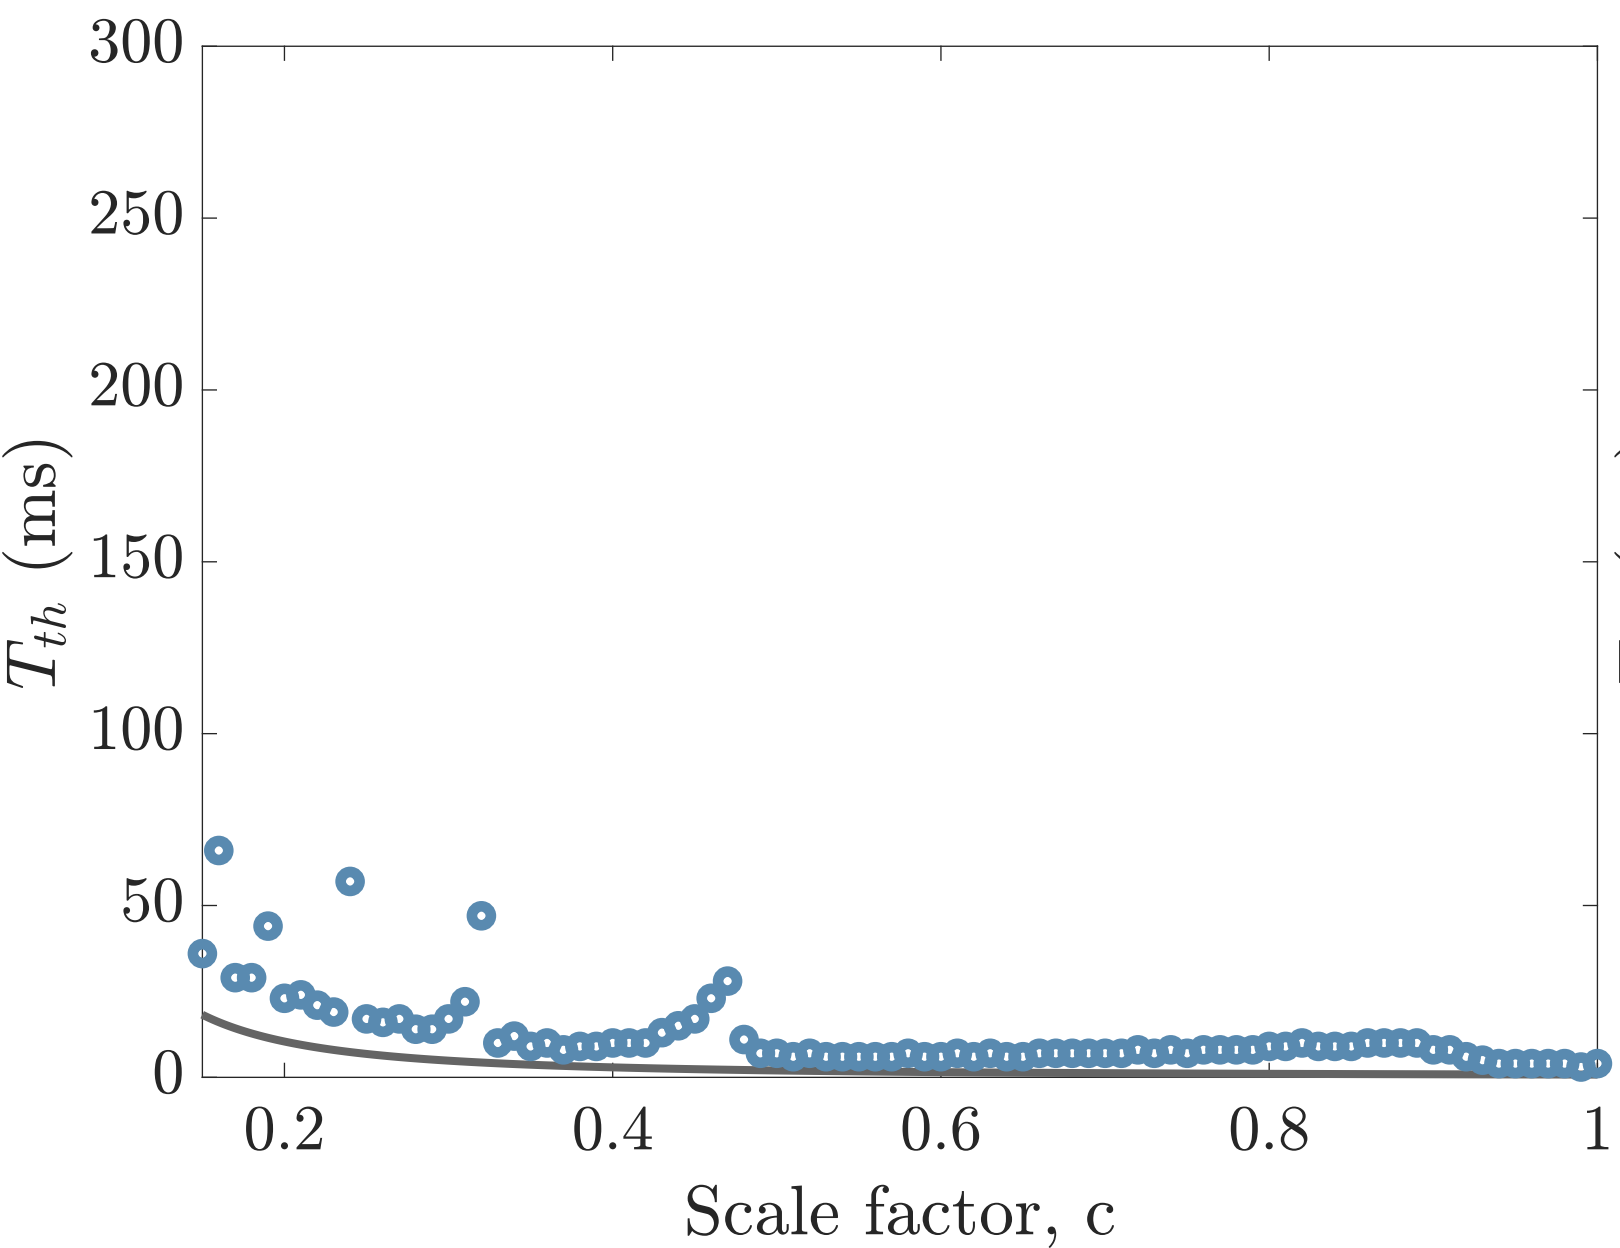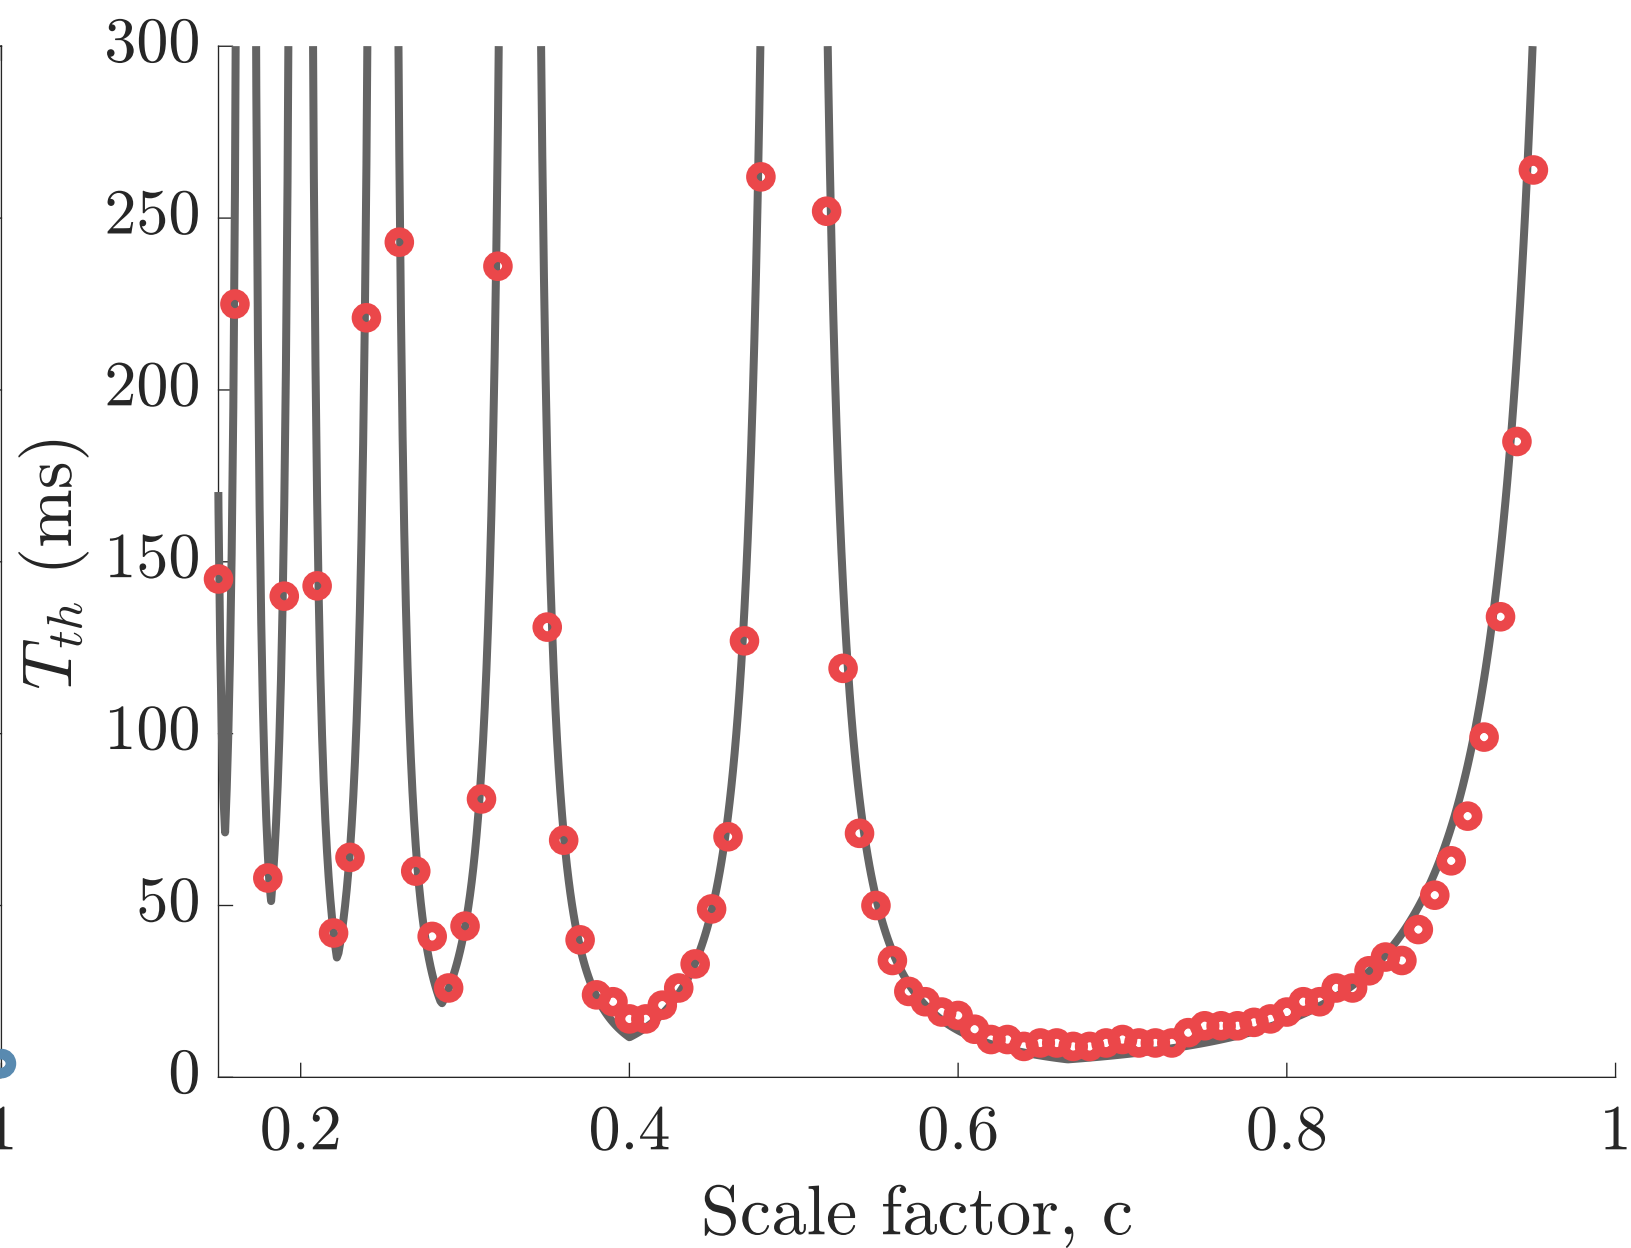

Supplement: supp [file elife-84531-supp-v1.zip]

**a**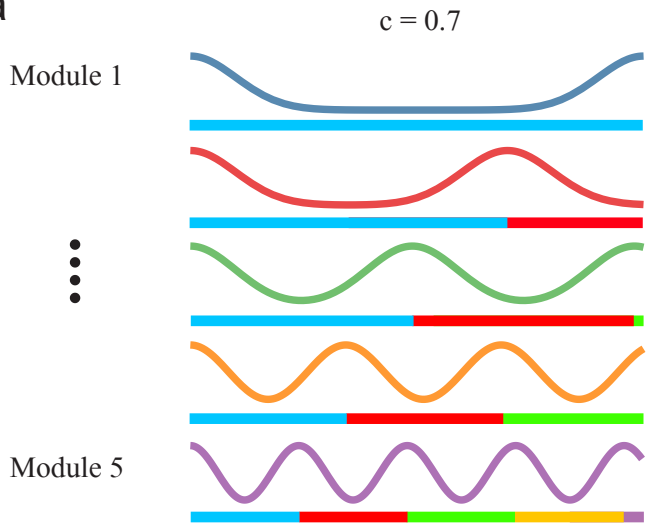**b**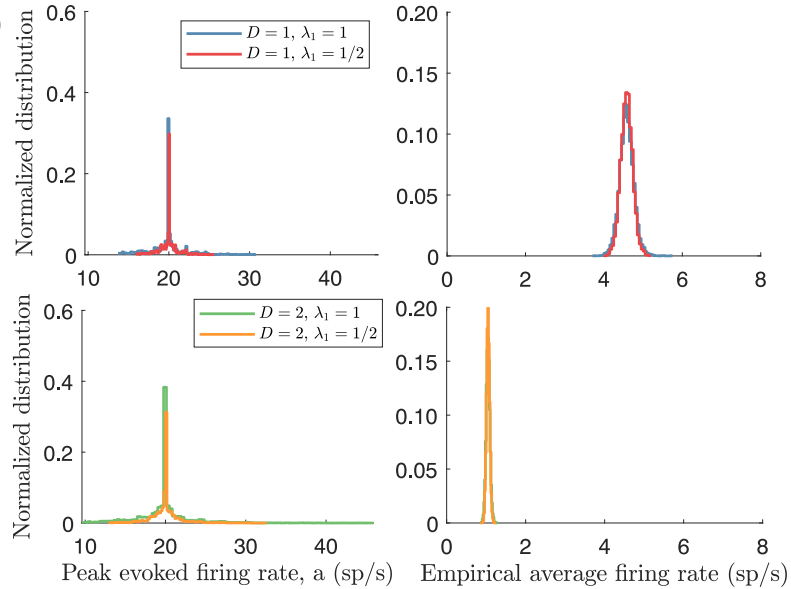**c**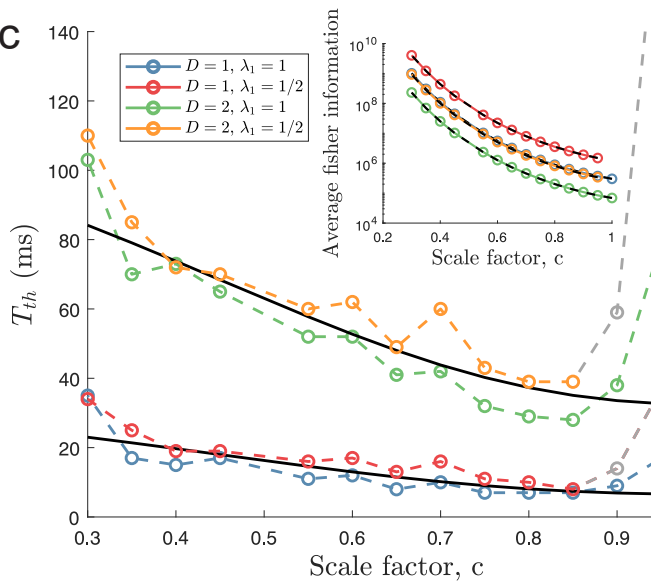**d**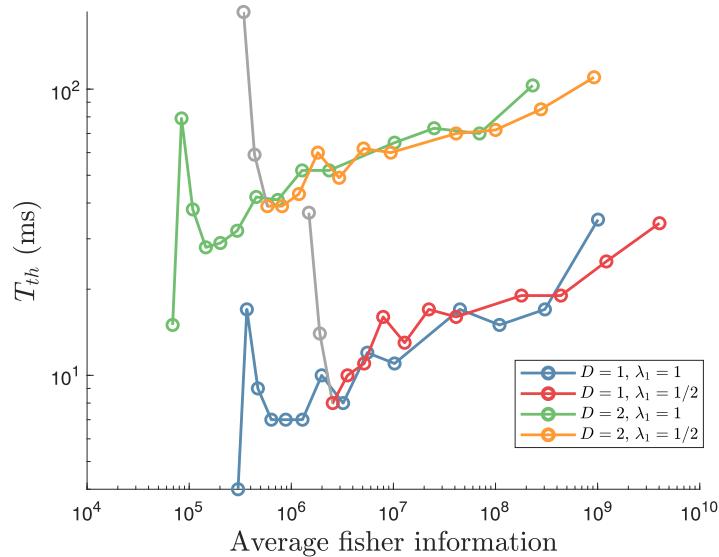

Supplement: supp [file elife-84531-supp-v1.zip]

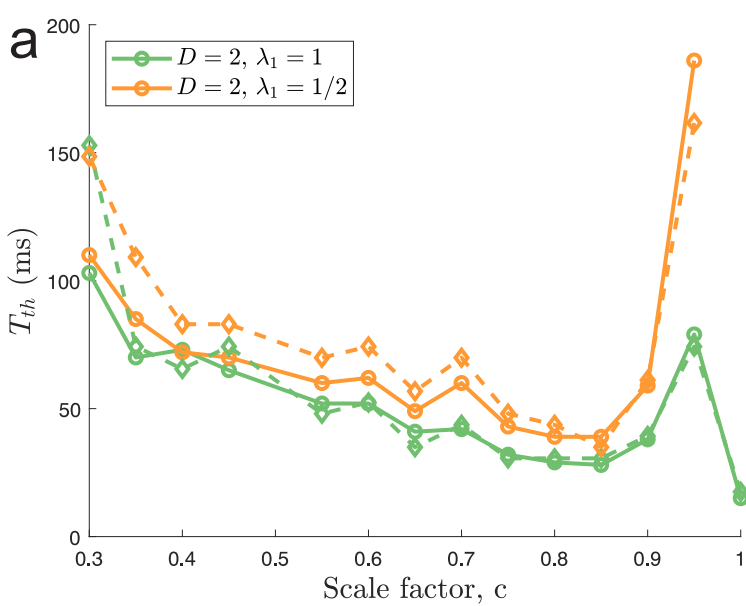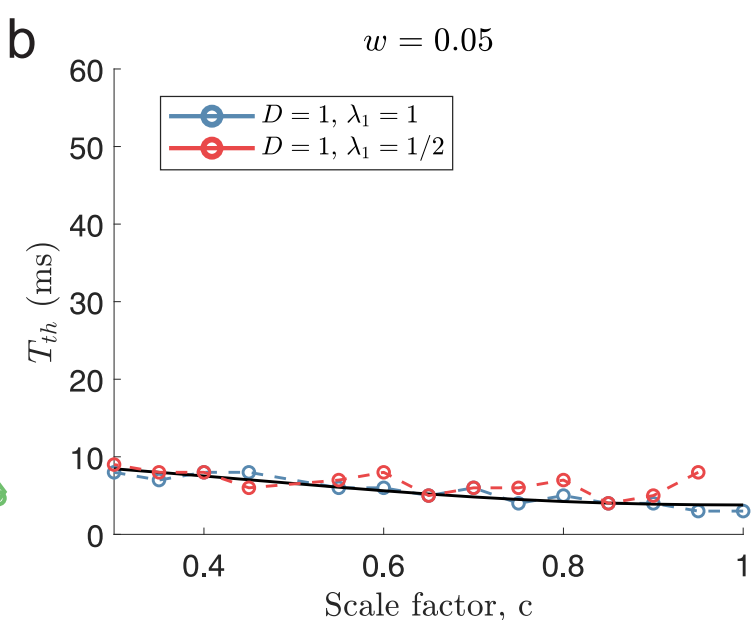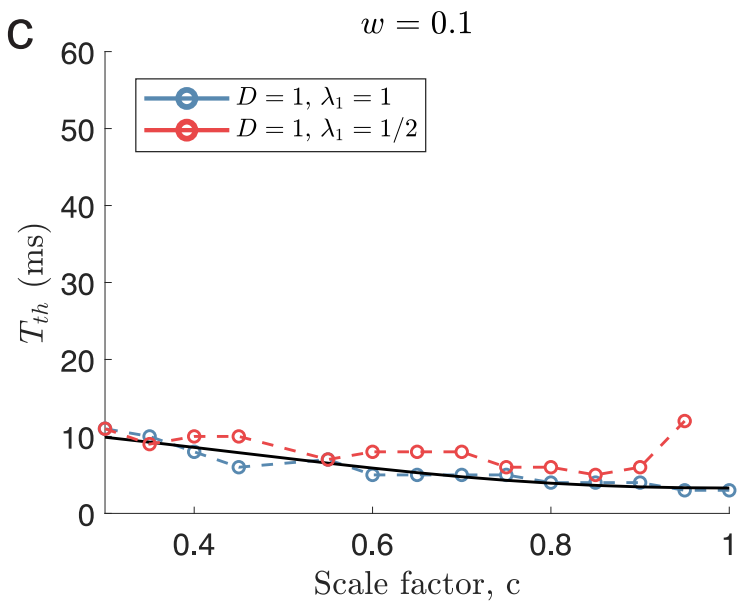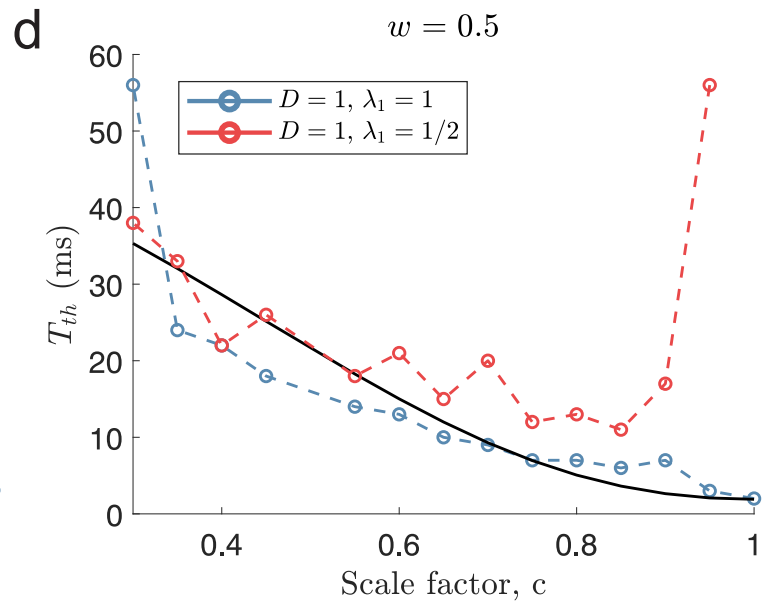

Supplement: supp [file elife-84531-supp-v1.zip]

$$c = 0.7$$
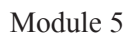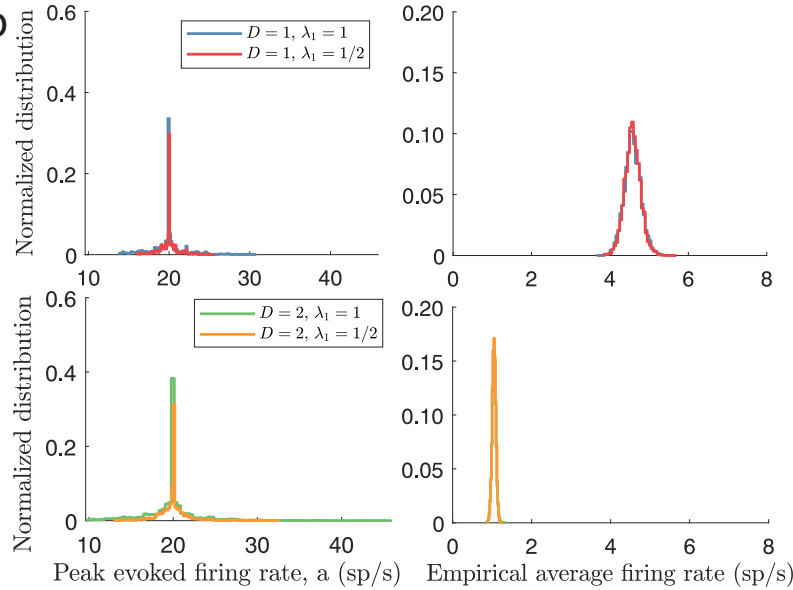 $T_{th} \text{ (ms)}$ 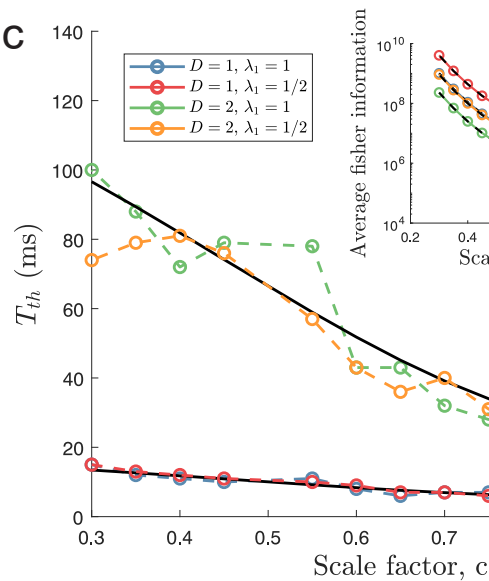

d

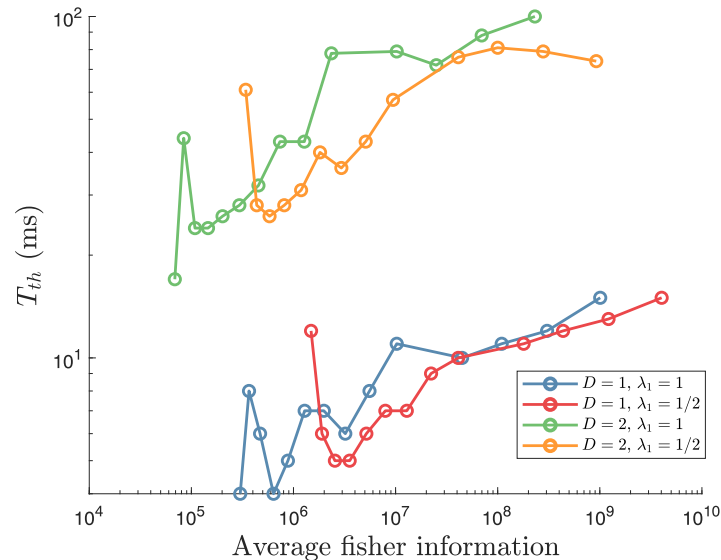

Supplement: supp [file elife-84531-supp-v1.zip]
